## RESEARCH ARTICLE

# Endurance and avoidance response patterns in pain patients: Application of action control theory in pain research

Jana Buchmann<sup>1\*</sup>, Nicola Baumann<sup>1\*</sup>, Karin Meng<sup>2</sup>, Jana Semrau<sup>3</sup>, Julius Kuhl<sup>4</sup>, Klaus Pfeifer<sup>3</sup>, Miguel Kazén<sup>4</sup>, Heiner Vogel<sup>5</sup>, Hermann Faller<sup>2</sup>

**1** Department I—Psychology, University of Trier, Trier, Germany, **2** Institute of Clinical Epidemiology and Biometry, University of Würzburg, Würzburg, Germany, **3** Department of Sport Science and Sport, Friedrich-Alexander-University Erlangen-Nürnberg, Erlangen, Germany, **4** Department of Psychology, University of Osnabrück, Osnabrück, Germany, **5** Section of Medical Psychology and Psychotherapy, University of Würzburg, Würzburg, Germany

\* [j.buchmann@mail.de](mailto:j.buchmann@mail.de) (JB); [nicola.baumann@uni-trier.de](mailto:nicola.baumann@uni-trier.de) (NB)

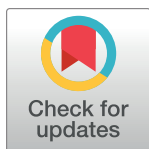

## OPEN ACCESS

**Citation:** Buchmann J, Baumann N, Meng K, Semrau J, Kuhl J, Pfeifer K, et al. (2021) Endurance and avoidance response patterns in pain patients: Application of action control theory in pain research. *PLoS ONE* 16(3): e0248875. <https://doi.org/10.1371/journal.pone.0248875>

**Editor:** Fuschia M. Sirois, University of Sheffield, UNITED KINGDOM

**Received:** July 23, 2020

**Accepted:** March 6, 2021

**Published:** March 25, 2021

**Copyright:** © 2021 Buchmann et al. This is an open access article distributed under the terms of the [Creative Commons Attribution License](https://creativecommons.org/licenses/by/4.0/), which permits unrestricted use, distribution, and reproduction in any medium, provided the original author and source are credited.

**Data Availability Statement:** The relevant study data are available at: <https://zenodo.org/record/4396288>, doi:10.5281/zenodo.4396288.

**Funding:** The data acquisition for this project was funded by the German Pension Insurance (Deutsche Rentenversicherung Bund, s.a. <http://forschung.deutsche-rentenversicherung.de/ForschPortalWeb/>) and the Federal Ministry of Education and Research (BMBF) within the research priority “Chronic diseases and patient orientation” (Grant number: 0421-FSCP-0529). The

## Abstract

### Background

Identifying pain-related response patterns and understanding functional mechanisms of symptom formation and recovery are important for improving treatment.

### Objectives

We aimed to replicate pain-related avoidance-endurance response patterns associated with the Fear-Avoidance Model, and its extension, the Avoidance-Endurance Model, and examined their differences in secondary measures of stress, action control (i.e., dispositional action vs. state orientation), coping, and health.

### Methods

Latent profile analysis (LPA) was conducted on self-report data from 536 patients with chronic non-specific low back pain at the beginning of an inpatient rehabilitation program. Measures of stress (i.e., pain, life stress) and action control were analyzed as covariates regarding their influence on the formation of different pain response profiles. Measures of coping and health were examined as dependent variables.

### Results

Partially in line with our assumptions, we found three pain response profiles of distress-avoidance, eustress-endurance, and low-endurance responses that are depending on the level of perceived stress and action control. Distress-avoidance responders emerged as the most burdened, dysfunctional patient group concerning measures of stress, action control, maladaptive coping, and health. Eustress-endurance responders showed one of the highest levels of action versus state orientation, as well as the highest levels of adaptive coping and physical activity. Low-endurance responders reported lower levels of stress as well as equal

publication was funded by the Open Access Fund of Universität Trier and the German Research Foundation (DFG) within the Open Access Publishing funding programme. The funders had no role in study design of this secondary study, nor data collection and analysis, decision to publish, nor preparation of the manuscript.

**Competing interests:** The authors have declared that no competing interests exist.

levels of action versus state orientation, maladaptive coping, and health compared to eustress-endurance responders; however, equally low levels of adaptive coping and physical activity compared to distress-avoidance responders.

## Conclusions

Apart from the partially supported assumptions of the Fear-Avoidance and Avoidance-Endurance Model, perceived stress and dispositional action versus state orientation may play a crucial role in the formation of pain-related avoidance-endurance response patterns that vary in degree of adaptiveness. Results suggest tailoring interventions based on behavioral and functional analysis of pain responses in order to more effectively improve patients quality of life.

## Introduction

Psychosocial risk and resilience factors play an important role in multidisciplinary biopsychosocial rehabilitation (MBR) of chronic non-specific low back pain, which is low back pain lasting more than 12 weeks without a specific pathoanatomical diagnosis [1–4]. Therefore, identifying pain-related response patterns and understanding underlying functional mechanisms of symptom formation and recovery are essential steps for tailoring interventions to increase the effectiveness of treatment [4,5].

Analyzing subgroups of patients by means of cluster analysis has a long tradition in pain research (e.g. [6–13]). In comparison to traditional clustering techniques (e.g., hierarchical and k-means cluster analyses), however, latent class or profile analyses constitute model-based clustering techniques that allow determining probabilities of group membership, the significant number of latent groups, goodness of model fit, and including covariates that are supposed to influence group membership. Up to date, only few studies based on traditional cluster analysis exist that specifically examined pain-related avoidance- and endurance responses in patients with (sub-)acute and chronic low back pain [14–19]. The focus of this study thus was to examine the appropriate number of pain-related avoidance and endurance response patterns by means of latent profile analysis as well as their primary and secondary characteristics. In addition, we analyzed the influence of stress and action control as covariates in accordance with Action Control Theory [20–22].

In the past two decades of cognitive-behavioral pain research, there has been growing interest in avoidance- and endurance-related pain response patterns and theoretical explanations of development and maintenance, or recovery from (chronic) pain (e.g., [15,16,19,23–27]). In the following, we explicate two prominent cognitive-behavioral models of pain chronification and associated studies concerning proposed cognitive, emotional and behavioral pain responses, and their health-related consequences. In addition, we specify how Action Control Theory may contribute to a better understanding of these processes and related empirical findings.

## Fear-avoidance model

As one of the most prominent models, the *Fear-Avoidance Model* (FAM) suggests two diametrically opposite paths with patterns of cognitive, emotional and behavioral pain responses,

which facilitate either the development of chronic pain, disability and depression (FAM-1), or else recovery (FAM-2):

FAM-1: Fear-avoidance responses, and

FAM-2: No-fear confrontational responses

Maladaptive fear-avoidance responses consist of catastrophizing, anxiety/depression, and avoidance of physical and social activities and are associated with elevated pain, disability, and depression, which is attributed to a kinesiophobia-like pathology [25]. Thereby, individuals interpret aversive pain experiences as a threatening sign of harm, injury, or a serious physical illness (catastrophizing), which elicits fear of pain and pain-related movements. Elevated pain-related fears, in turn, lead to rapid increases in pain perception (hypervigilance) and avoidance of pain-related movements. In the short-term, associated decreases in pain and emotional distress may reinforce avoidance behavior. In the long-term, however, increased avoidance and reduction of physical and social activities may facilitate physical deconditioning, accumulate loss of social reinforcement, and finally lead to a disuse syndrome [25,28]. In contrast, no-fear confrontational pain responses without catastrophizing and conditioned avoidance behavior are assumed to prevent chronic pain and facilitate recovery [25].

Empirical evidence, however, partially contradicts the assumptions of the existence of only one fear-avoidance response pattern and only one single path to chronic pain as proposed by the FAM. For example, in line with the FAM, there is evidence supporting the assumption that catastrophizing and/or pain-related fear/anxiety are associated with avoidance of pain-related movements, changes in musculoskeletal functioning and flexion, and increases in pain, distress, and disability [25,27,29–33]. In addition, Smeets and colleagues found evidence for reduced aerobic fitness in patients with chronic low back pain compared to a healthy control group [34]. Other RCT studies, however, found little or no evidence for disuse and physical deconditioning in patients with chronic low back pain [28,35,36]. Likewise, several findings contradict the assumption that catastrophizing or pain-related fear/anxiety are associated with reduced physical activity, physical deconditioning, or poor outcomes [25,34,37,38].

### Avoidance-endurance model

One possible explanation for these inconsistent results is that both anxious and non-anxious individuals often respond with persistence despite pain instead of fear-avoidance behavior. Consistent with this explanation, endurance-related pain responses were shown to occur as often or even more frequently as fear-avoidance responses [26,39]. Accordingly, the *Avoidance-Endurance Model* (AEM) proposes excessive endurance responses despite pain to be responsible for increases and maintenance of pain and disability. Thus, the AEM includes fear-avoidance responses (AEM-1), as does the FAM, but further suggests maladaptive distress-/eustress-endurance responses despite pain that consist of thought suppression, persistence behavior despite pain, and either anxiety/depression (AEM-2) or else positive mood (AEM-3) [40]. In contrast to these first three response patterns, the AEM proposes adaptive responses (AEM-4) to be characterized by low endurance and avoidance responses, and to prevent the development of chronic pain due to an adequate balance between activity and relaxation:

AEM-1: Fear-avoidance responses,

AEM-2: Distress-endurance responses,

AEM-3: Eustress-endurance responses,

## AEM-4: Adaptive responses.

As a consequence of pain and pain-related fear/anxiety, people may not only try to avoid pain-related movements or interrupt activity in general (“flight” or “freezing” responses). Especially under chronic exposure to stress (e.g., external control, work-related demands, and ongoing valued activities), they may even try harder to control the intrusive outbreaks of pain and inner conflicts, or avoid anticipated loss and negative outcomes by means of suppression and persistence responses despite pain (“fight” response). This may be especially reflected in distress-endurance responses [39,41].

Hasenbring and colleagues assumed that eustress-endurance responders, in comparison to distress-endurance responders, show less disability because they are more active and better withstand pain-related interruptions of daily activities [42]. In the long-term, however, the AEM generally proposes endurance responses to be detrimental due to excessive overactivity, prolonged postural strain/overuse, and suboptimal motor control [26,39]. These are supposed to cause overload and new (micro-)injuries of soft tissues, which lead to increases and maintenance of pain and disability. Supporting these assumptions, studies based on three or four AEM patterns partially found endurance responders to show higher levels of constant strain positions, accelerometer-based physical activity, pain, and/or disability than did adaptive responders [42–44], as well as higher accelerometer-based physical activity and pain than did fear-avoidance responders [44]. Cluster-analytical studies (see Table 1), however, found no differences between AEM-like response clusters in other measures of physical activity [15,16].

Most of the respective cluster-analytical studies further reported less pain, better health and better functioning in pain patients with non-avoidant confronting/eustress-endurance and adaptive responses than in patients with distress-endurance and/or avoidance responses [15–

**Table 1. Overview of cluster-analytical studies based on pain-related avoidance-endurance responses.**

| Study samples                                                                                      | Cluster variables/analysis                                                                                                                                                  | Cluster solutions (discussion)                                                                                                                                    |
|----------------------------------------------------------------------------------------------------|-----------------------------------------------------------------------------------------------------------------------------------------------------------------------------|-------------------------------------------------------------------------------------------------------------------------------------------------------------------|
| Grebner et al. [14]: N = 82 patients with recurrent acute radicular pain (pre-surgical)            | 11 avoidance-endurance subscales (KPI/AEQ), depression (ADS); <b>HCA Ward</b>                                                                                               | <b>4 clusters (AEM-like):</b> FAR, DER, EER, AR (R confounded with C variables)                                                                                   |
| Fehrmann et al. [15]: N = 137 patients with chronic low back pain (pre-treatment)                  | 2 endurance subscales (AEQ), 1 subscale of SF-36; <b>HCA Ward</b>                                                                                                           | <b>4 clusters (AEM-like):</b> FAR, DER, EER, AR (without avoidance responses, 15 of 23 indices for 3-cluster solution, R confounded with C variables)             |
| McCracken & Samuel [16]: N = 276 patients with chronic pain <sup>1</sup>                           | Avoidance, confronting (task/pain persistence), pacing (PARQ); <b>HCA Ward</b>                                                                                              | <b>4 clusters (AEM-like):</b> Avoiders, extreme, medium cyclers (~pacing), doers                                                                                  |
| Esteve et al. [17]: N = 276 patients with chronic musculoskeletal pain <sup>1</sup>                | Pain/activity avoidance, task-contingent, pain-contingent, excessive persistence, pacing (APS); <b>HCA Ward</b>                                                             | <b>4 clusters (AEM-like):</b> avoiders (with pacing), extreme, medium cyclers (~pacing), doers                                                                    |
| Holldorf et al. [18]: N = 268 patients with subacute radicular pain (post-surgical, pre-treatment) | Pain-related self-instructions (FSS), fear-avoidance beliefs (FABQ-D), coping (FKV-LIS-SE), anxiety, depression (HADS-D), health status (SF-36); <b>HCA Ward</b>            | <b>2 clusters (FAM-like):</b> Depressive avoiders, eustress endurance (R confounded with C variables)                                                             |
| Cane et al. [19]: N = 842/307 pain patients (pre-/post-treatment)                                  | Subscales for avoidant, overdoing, pacing (POAM-P); <b>HCA Ward</b>                                                                                                         | <b>Pre: 2 clusters (FAM-like):</b> Avoidance-pacing, persistence <b>Post: 4 clusters (AEM-like):</b> Avoidance-pacing, persistence, mixed, pacing                 |
| Rabey et al. [45]: N = 294 patients with chronic low back pain <sup>1</sup>                        | 2 endurance subscales (AEQ), catastrophizing (PCS), acceptance (CPAQ), self-efficacy (PSEQ), fear-avoidance-beliefs (FABQ), stress, anxiety, depression, (DASS); <b>LCA</b> | <b>3 clusters:</b> With differing median levels of stress, EA responses, coping, and mental health (R confounded with S and C variables, no pairwise comparisons) |

Note: HCA = hierarchical cluster analysis, LCA = latent class analysis; FAR = fear-avoidance responses, DER = distress-endurance responses, EER = eustress-endurance responses, AR = adaptive responses; S = stimulus variables, O = organismic variables, R = response variables, C = consequences, according to the S-O-R-C scheme for behavioral and functional analyses [46] (i.e., adapted for functional analyses by discriminating content-focused response and function-focused organismic variables according to Kuhl [47])

<sup>1</sup> no information concerning pre-/post-treatment status.

<https://doi.org/10.1371/journal.pone.0248875.t001>

17,19]. In addition, eustress-endurance responders, similar to low-endurance responders, showed a better therapy prognosis than did fear-avoidance or distress-endurance responders [15,24]. Findings suggest that patients with eustress-endurance and adaptive responses may have better self-regulatory abilities contributing to better coping, health, and therapy prognosis than do patients with fear-avoidance or distress-endurance responses. In particular, stress research suggests eustress responses to be a result of increased volitional capabilities to cope with life stress, as well as subjective evaluations of stress (responses) as controllable or gain-related, associated with positive feelings, self-efficacy, and better health [48–52].

### Action control theory

Against this background, we seek to better understand the underlying stress-dependent mechanisms of *progression* in terms of facilitated top-down control of action according to someone's needs and specific to global goals versus *regression* to lower levels of functioning in terms of stimulus-driven automatic, impulsive or conditioned behavior under external control [47,50]. To this end, we employ the *Action Control Theory* (ACT), which proposes *action versus state orientation* as an organismic resilience versus risk factor (O) moderating or mediating symptom formation, maintenance, and recovery from life stress [20,22,47,53–56]. State orientation is defined as a disposition for excessive *preoccupation* with uncontrollable, failure-related thoughts (rumination) instead of action-oriented disengagement; and for *hesitation* instead of action-oriented initiative concerning difficult intentions to reach an alternatively intended goal [57,58]. Thus, dispositional action (vs. state) orientation captures the ability to maintain or even enhance executive volitional functioning under threatening and demanding conditions, including pain [20,22,50,59–62].

In the face of elevated life stress (i.e., threats and demands), action- as compared to state-oriented individuals can better intuitively self-regulate emotions, that is down-regulate negative emotions through self-relaxation and up-regulate positive emotions through self-motivation [53,56,63–65]. A better intuitive emotion regulation is associated with a better top-down control of goal-oriented processing, such as self-discrimination and coherence judgements, updating working memory to disengage from unwanted or unattainable goals, inhibiting counter-intentional automatized processes, as well as initiating and persisting in (pro-)active coping activities [20,22,53,61–63,66–71].

Therefore, and due to more context-sensitive forms of self-confrontative coping, action (vs. state-) oriented individuals are predisposed to a better adjustment to pain- and work-related life stress [20,22,50,72]. Consistent with this assumption, state- compared to action-oriented patients reported more pain and distress, negative thoughts, monitoring of their wounds, and less successful distraction efforts after a surgery of hernia [22]. Moreover, Luka-Krausgrill, Wurmthaler, Wiesheu and Becker found that depressed patients with chronic pain showed higher levels of life stress and state orientation than did non-depressed patients.

Little is known, however, about the stress-dependent formation of specific pain response patterns in patients with chronic low back pain. In contrast to the assumptions of the AEM, for example, patients with low-endurance responses may be confronted with less pain- and work-related life stress (i.e. threats and demands) that usually may trigger avoidance and endurance responses. Moreover, in comparison to Action Control Theory, FAM and AEM do not make any assumptions about different self-regulatory abilities that may predispose patients to develop more or less adequate strategies to cope with different levels of pain- and work-related life stress. The present study aimed to additionally address these two aspects by means of covariate analyses.

### Objective 1: Replicating FAM-/AEM-like pain response profiles

To our knowledge, this is the first study that aimed to identify the (appropriate number of) latent profiles underlying avoidance and endurance responses in patients with chronic non-specific low back pain. We thereby examined the characteristics of FAM-/AEM-like pain response profiles by using cognitive, emotional, and behavioral avoidance-endurance response measures (i.e., pain response measures as primary indicator variables for latent profile analysis).

According to FAM and AEM, we expected two distinct profiles of diametrically opposing fear-avoidance and no-fear (confrontational) eustress-endurance responses. In line with AEM, we further expected two less distinct and opposite profiles of distress-endurance and low-endurance responses (analogous to the low-risk adaptive AEM pattern). Together, we aimed to replicate the following four FAM- plus AEM-like pain response profiles in patients with chronic non-specific low back pain:

1. *Fear-avoidance responses (FAR)*, with high levels of avoidance responses and low levels of endurance responses,
2. *Distress-endurance responses (DER)*, with high levels of both distress-endurance and avoidance responses,
3. *Eustress-endurance responses (EER)*, with high levels of eustress-/endurance responses and low levels of avoidance responses,
4. *Low-endurance responses (LER)*, with low levels of both endurance and avoidance responses.

### Objective 2: Differences between pain response profiles in secondary measures

Our second objective was to validate pain response profiles with regard to secondary S-O-R-C measures, which is a prerequisite for an integrative behavioral and functional analysis that combines Action Control Theory with cognitive-behavioral S-(O)-R-C models of pain chronicity (i.e., the FAM and AEM). The S-O-R-C scheme by Kanfer and colleagues differentiates psychological parameters concerning certain stimuli (S), mediating or moderating organismic variables (O), cognitive, emotional and behavioral responses (R), and their consequences (C). We therefore examined whether distinct pain response profiles (R) differ in secondary measures of stress (S), action control (O), coping (R), and health (C). In comparison to secondary measures of stress (i.e., pain and life stress) and action control, which are supposed to be independent variables (i.e., covariates) that influence the formation of pain response profiles, secondary measures of mal-/adaptive coping and health are supposed to be dependent variables (i.e., additional pain response characteristics and health outcomes that are assumed to be associated with or determined by the underlying pain response profiles).

**Covariates.** In line with Action Control Theory, we mainly expected significant differences between two pairs of opposite response profiles based on different levels of stress and action control: Pain patients with high levels of pain and life stress (i.e., perceived threats and demands as potential triggers of avoidance and endurance responses) as well as low action control due to low self-regulatory abilities to cope with stress were assumed to either show marked fear-avoidance, or distress-endurance responses to pain (i.e., regressive “flight” or “fight” responses). In contrast, pain patients with better self-regulatory abilities to cope with stress, who perceive higher levels of pain and life stress, rather may develop a more successful eustress-endurance response profile. Finally, patients who experience lower levels of pain and

life stress presumably associated with higher self-regulatory ability to cope with stress may show a profile of low-endurance responses (analogous to the low-risk adaptive AEM pattern).

Together, we assumed that patients with fear-avoidance and those with distress-endurance responses suffer from higher levels of pain and life stress as well as lower levels of action versus state orientation, and would show the poorest adaptive coping, and health as compared to patients with eustress-endurance or low-endurance responses, respectively. In contrast, we expected that eustress-endurance and low-endurance responders are predisposed by higher levels of action versus state orientation, whereas low-endurance responders, however, would show lower levels of pain and life stress as compared to the other three response profiles. Moreover, eustress-endurance responders are assumed to show the highest levels of physical activity as well as equal levels of mal-/adaptive coping and health as compared to patients with low-endurance responses.

## Method

### Participants

The current study is a secondary analysis of data from  $n = 536$  patients with chronic non-specific low back pain from three German rehabilitation centers. Participants attended an inpatient orthopedic rehabilitation program and were recruited for one year. Exclusion criteria of the primary study were age below 18 or above 65 years, inadequate German language ability, severe impairment of vision or hearing, a poor health state preventing patients from participation in additional patient education and filling out questionnaires, severe co-morbid psychiatric disorders, and an ongoing retirement application [1]. All participants provided written informed consent. The primary study was approved by the Ethics Committee of the University of Erlangen-Nürnberg and performed following the Declaration of Helsinki.

### Measures

This study is based on self-report data of patients at the beginning of an inpatient rehabilitation program. Besides the variables described below, the questionnaire included demographic and social-medical information (see Table 2).

**Primary response measures.** Cognitive, emotional, and behavioral avoidance-endurance responses within the last two weeks was assessed by nine subscales of the Avoidance-Endurance Questionnaire (AEQ) [40]. Avoidance-related subscales were *catastrophizing* (3 items), *help-/hopelessness* (9 items), *anxiety/depression* (7 items), *avoidance of physical activity* (12 items), and *social activity* (10 items). Endurance-related subscales were *anxiety/depression* (7 items) for distress-endurance, *thought suppression* (4 items) and *task/pain persistence* (14 items) for both eustress- and distress-endurance, as well as *positive mood* (3 items) and *humor/distraction* (10 items) for eustress-endurance responses. Half of the items related to behavioral AEQ subscales address responses under mild pain, the other half responses under severe pain. Analyses of internal consistency yielded Cronbach's  $\alpha = .84$  to  $.92$ . Higher mean values indicate higher frequencies of avoidance and endurance responses to pain.

**Secondary measures.** To assess *pain*, patients were asked to rate their current, worst and average pain intensity during the last week on an eleven-point numerical rating scale (NRS; 3 items, Cronbach's  $\alpha = .77$ ) adapted from Nagel and colleagues [73]. A mean score for pain was computed, with higher mean values indicating higher pain. *Life stress* was measured by an adopted scale from the short version of the Volitional Components Inventory (VCI) [74]. Due to high correlations between the original two subscales 'threats' and 'demands' ( $r = .79, p < .001$ ), we created one scale 'threats and demands' (8 items, Cronbach's  $\alpha = .91$ ), with higher sum scores indicating higher levels of life stress.

**Table 2. Frequencies, means and standard deviations in socio-demographical, medical, primary response, and secondary variables.**

| Variables                                        | M (SD)      |
|--------------------------------------------------|-------------|
| Age (years)                                      | 49.1 (8.1)  |
| Sex, female n (%)                                | 275 (51.3)  |
| Higher-level school education (> 10 years) n (%) | 112 (20.9)  |
| Currently in paid employment n (%)               | 481 (89.7)  |
| Medical visits last 6 months                     | 5.3 (5.6)   |
| Days off work due to back pain last 6 months     | 19.9 (38.5) |
| Catastrophizing                                  | 0.9 (1.1)   |
| Help-/hopelessness                               | 2.2 (1.2)   |
| Anxiety/depression                               | 2.2 (1.2)   |
| Avoidance of physical activity                   | 3.1 (1.0)   |
| Avoidance of social activity                     | 1.9 (1.1)   |
| Thought suppression                              | 3.5 (1.5)   |
| Positive mood                                    | 3.4 (1.2)   |
| Humor/distraction                                | 3.2 (1.0)   |
| Task/pain persistence                            | 3.5 (0.9)   |
| Pain                                             | 5.8 (1.6)   |
| Life stress                                      | 7.3 (5.3)   |
| Failure-related action orientation               | 5.7 (3.4)   |
| Prospective action orientation                   | 7.4 (3.2)   |
| Subjective competence                            | 16.2 (4.5)  |
| Cognitive restructuring                          | 14.3 (4.7)  |
| Rumination                                       | 2.1 (0.9)   |
| Pain-related fear (somatic focus)                | 5.0 (3.4)   |
| Physical Activity                                | 8.1 (5.7)   |
| Depression                                       | 6.5 (4.3)   |
| Mental health                                    | 47.1 (11.3) |
| Physical health                                  | 37.7 (8.6)  |

Note: M = unstandardized mean, SD = standard deviation.

<https://doi.org/10.1371/journal.pone.0248875.t002>

To assess dispositional *action versus state orientation*, the Action Control Scale (ACS-90) [58] was administered. The ACS-90 consists of two subscales (12 items each) with a dual response format capturing *failure-related action versus state orientation* (AOF; disengagement vs. preoccupation, Cronbach's  $\alpha = .82$ ); and *prospective action versus state orientation* (AOP; initiative vs. hesitation, Cronbach's  $\alpha = .79$ ). Higher sum scores indicate higher levels of action orientation.

Adaptive coping was assessed by the subscales *subjective competence* and *cognitive restructuring* (4 items, Cronbach's  $\alpha = .80/.73$ ) from the German Pain Management Questionnaire (FESV) [75]. Maladaptive coping in terms of *rumination* and *pain-related fear* was assessed by the subscales *rumination* (4 items, Cronbach's  $\alpha = .83$ ) from the Pain Catastrophizing Scale (PCS) [76], and *fear of pain/(re-)injury-somatic focus* (5 items, Cronbach's  $\alpha = .79$ ) from the German version of Tampa Scale of Kinesiophobia (TSK-GV) [77]. Higher mean values indicate higher levels of adaptive and maladaptive coping, respectively. Moreover, *physical activity* was assessed by eight items from the Freiburg Questionnaire of Physical Activity (FFkA) [78]. It measures basic (e.g. stairs climbed, walking, cycling), leisure (e.g. gardening) and sports activities in the last week or month. Item scores were summarized to build an overall sum score expressed in hours per week.



*Depression* was assessed by the eight-item version of the depression module of the Patient Health Questionnaire (PHQ-8) [79]. It measures the severity of depressive symptoms over the past two weeks, with higher sum scores indicating more severe depression (Cronbach's  $\alpha = .83$ ). *Mental* and *physical health* were measured by the German version of the SF-12 Health Survey [80], with higher scores indicating a better health state.

## Statistical analysis

Statistical analyses were carried out using SPSS 23 (IBM Corp., Armonk, NY), and Mplus™, version 7 (Muthén & Muthén, Los Angeles, CA) [81]. Missing data were imputed using a multiple imputation procedure. Means and standard deviations for quantitative variables as well as frequencies and percentages for categorical variables were computed to describe patient characteristics and relations between primary indicator and secondary variables (see also S1–S3 Tables). Moreover, SPSS was used to depict and evaluate most of the characteristics of and differences between the final subgroups.

Latent profile analysis (LPA) [82–85] was conducted by Mplus to classify patients into homogeneous subgroups (i.e., latent profiles), who additionally share a meaningful and interpretable pattern of pain-related cognitive, emotional, and behavioral avoidance-endurance responses. In comparison to latent class analysis (LCA), which is used to identify subgroups based on categorical indicator variables, LPA is used to identify subgroups of patients based on continuous indicator variables [84] such as individual mean values on the AEQ subscales.

The LPA was done in two steps: First, the best set of starting values was identified and replicated to evaluating fit indices for each of five models ranging from one to five latent profiles without covariates (unconditional model) [84,85]. Thereby, one thousand random starts were calculated to prevent local solutions. Second, four covariates that were assumed to influence the formation of different response profiles (i.e., pain, life stress, failure-related and prospective action versus state orientation) were evaluated in the LPA for the selected best fitting model [84]. Each covariate was evaluated separately with respect to their contribution to the fit of the final model, as well as differences between pairs of latent profiles by using logistic regression analysis (i.e., with covariates as independent variables, and latent profile variable as dependent variable).

Estimation of latent profile membership and covariance analysis were carried out with robust maximum-likelihood (MLR) using the expectation-maximum (EM) algorithm [86]. Concerning model adequacy, the minimum average probability of latent class/profile membership should be  $>.80$  [85]. The most appropriate number of latent profiles was identified by evaluating several fit indices, such as the log likelihood value (LL), Akaike's Information Criterion (AIC), Bayesian Information Criterion (BIC), Sample-Adjusted BIC (SABIC), and entropy as well as by using the adjusted Lo-Mendell Ruben test (LMR) and bootstrap likelihood ratio test (BLRT). Whereas LL, AIC, BIC, and SABIC indicate increasing model fit by decreasing values, entropy is as measure of classification uncertainty with well-fitting models indicated by values  $\geq .80$  [84]. In addition, a well-fitting model has to make sense conceptually, and the estimated profiles should differ as hypothesized in secondary variables that were not used as primary indicator variables to generate the model [87].

After identifying the latent profile solution that best fits the data, differences between pain response profiles in primary and secondary response characteristics and more distal health outcomes were evaluated using univariate analyses of variance (ANOVAs) and pairwise multiple mean comparisons (i.e., with the latent profile variable as independent variable, and secondary response and health outcomes as dependent variables). For all statistical tests,  $p$ -values of  $p < .05$  were considered statistically significant.

## Results

### Descriptives

In the total sample ( $n = 536$ ), participants' mean age was 49 years, with ages ranging from 19 to 64 years. Fifty-one percent ( $n = 275$ ) of the sample were women, and 90% were in paid employment at the beginning of rehabilitation (for more information, see [Table 2](#)).

### Objective 1: Replicating FAM-/AEM-like pain response profiles

Latent profile analysis and LMR tests revealed that the three-profile model had a significantly better model fit than the two-profile model (see [Table 3](#)). Against our hypotheses, however, LMR test revealed that the fit of the four-profile model did not significantly improve as compared to the three-profile model. Moreover, aside from similar profiles like those of the three-profile solution, the four-profile solution only revealed a fourth less distinct and opposite eustress-endurance-related pain response profile. Thus, we selected the more parsimonious three-profile model since it revealed better LMR test results and interpretability than the other models with four or five response profiles, respectively. A good model adequacy of the three-profile solution is further indicated by the average probabilities for most likely latent profile membership, which amounted to .93 (profile 1) and .90 (profiles 2, 3).

Partially in line with our hypotheses, LPA revealed the following three response profiles (for more information on means, standard deviations, significance of differences and relative position, see [Tables 4](#) and [S3](#), and [Fig 1](#)):

1. *Distress-avoidance responses* (DAR:  $n = 208$ , 39%) with higher levels of catastrophizing, help-/hopelessness, anxiety/depression, avoidance behavior, and thought suppression, medium levels of task/pain persistence, as well as lower levels of positive mood and humor/distraction;
2. *Eustress-endurance responses* (EER:  $n = 187$ , 35%) with lower to medium levels of catastrophizing, help-/hopelessness, anxiety/depression and avoidance behavior; as well as higher levels of thought suppression and task/pain persistence, positive mood and humor/distraction;
3. *Low-endurance responses* (LER:  $n = 141$ , 26%) with lower levels of catastrophizing, help-/hopelessness, and anxiety/depression, medium levels of avoidance behavior, as well as lower levels of thought suppression and task/pain persistence, positive mood and humor/distraction.

**Table 3. LPA model fit summary.**

| Model Profile/s | Log likelihood  | AIC             | BIC             | SABIC           | Entropy     | Smallest class % | LMR p-value | LMR meaning     | BLRT p-value | BLRT meaning    |
|-----------------|-----------------|-----------------|-----------------|-----------------|-------------|------------------|-------------|-----------------|--------------|-----------------|
| 1               | -7427.25        | 14890.49        | 14967.61        | 14910.47        |             |                  | -           | -               | -            | -               |
| 2               | -7053.37        | 14162.73        | 14282.69        | 14193.81        | 0.78        | 42               | ***         | 2 > 1           | ***          | 2 > 1           |
| 3               | <b>-6869.16</b> | <b>13814.31</b> | <b>13977.11</b> | <b>13856.49</b> | <b>0.80</b> | <b>26</b>        | ***         | <b>3 &gt; 2</b> | ***          | <b>3 &gt; 2</b> |
| 4               | -6770.32        | 13636.64        | 13842.28        | 13689.91        | 0.80        | 17               | n.s.        | 4 < 3           | ***          | 4 > 3           |
| 5               | -6696.42        | 13508.83        | 13757.31        | 13573.20        | 0.80        | 10               | n.s.        | 5 < 4           | ***          | 5 > 4           |

Note.  $n = 536$ ; LPA = latent profile analysis; AIC = Akaike's Information Criterion; BIC = Bayesian Information Criterion; SABIC = Sample-Adjusted BIC; LMR = Lo-Mendell Ruben; BLRT = bootstrap likelihood ratio test; The LMR test and the BLRT compare the current model to a model with  $k-1$  profiles, significant test results support the retention of the more complex solution

\*\*\* =  $p < .001$ .

<https://doi.org/10.1371/journal.pone.0248875.t003>

**Table 4. Means and standard deviations of pain response profiles in primary response measures.**

| Primary response measures   | EER         | LER         | DAR         |
|-----------------------------|-------------|-------------|-------------|
|                             | M (SD)      | M (SD)      | M (SD)      |
| Catastrophizing             | 0.63 (0.87) | 0.45 (0.78) | 1.45 (1.31) |
| Help-/hopelessness          | 1.81 (0.95) | 1.24 (0.76) | 3.12 (0.89) |
| Anxiety/depression          | 1.70 (0.89) | 1.43 (0.90) | 3.24 (0.93) |
| Avoidance physical activity | 2.57 (0.91) | 3.23 (1.02) | 3.55 (0.79) |
| Avoidance social activity   | 1.22 (0.74) | 1.62 (0.94) | 2.80 (0.96) |
| Thought suppression         | 4.18 (1.01) | 1.74 (1.09) | 3.98 (1.00) |
| Positive mood               | 4.24 (0.85) | 3.61 (1.19) | 2.59 (1.04) |
| Humor/distraction           | 3.93 (0.74) | 2.85 (0.85) | 2.71 (0.79) |
| Task/pain persistence       | 4.21 (0.68) | 2.70 (0.81) | 3.50 (0.70) |

Note: M = unstandardized mean, SD = standard deviation; EER = Eustress-endurance, LER = Low-endurance, DAR = Distress-avoidance responders.

<https://doi.org/10.1371/journal.pone.0248875.t004>

**Overall effects.** Univariate ANOVAs yielded significant differences ( $p < .001$ ) with large effect-sizes (partial  $\eta^2$ ) indicating substantial contributions of each measure to discriminating between the profiles (see Fig 1).

**Multiple mean comparisons.** Mostly as expected, we found two almost diametrically opposing response profiles of distress-avoidance and eustress-endurance responses. Patients with distress-avoidance responses showed higher scores on all avoidance-related subscales and lower scores on the endurance-related subscales compared to patients with eustress-endurance responses; except for equal levels of thought suppression (see also Fig 1). Almost in line with our assumptions, we further found a third profile of low-avoidance-endurance responses with the lowest levels of catastrophizing, help-/hopelessness, anxiety/depression, thought suppression, and task/pain persistence compared to both other pain response profiles.

Unexpectedly, we did not find a distinct cluster of pure fear-avoidance responses in neither the three- nor the four-profile-solutions.

## Objective 2: Differences between pain response profiles in secondary measures

**Covariates.** In line with our hypotheses, covariate analyses mostly yielded significant differences between the latent profiles for each covariate, except for non-significant differences between eustress-endurance and low-endurance responders on measures of action (vs. state) orientation (see Table 5). Almost as expected, distress-avoidance responders showed the highest levels of pain and life stress as well as the lowest levels of action (vs. state) orientation as compared to both other response profiles. Moreover, low-endurance responders revealed the lowest levels of pain and life stress as well as similar levels of action (vs. state) orientation as compared to eustress-endurance responders (see Fig 2).

**Overall effects on dependent secondary measures.** As further expected, univariate ANOVAs yielded significant differences between the profiles on all secondary measures of coping including physical activity ( $F = 10.41$ ,  $p = .000$ ,  $\eta^2 = .04$ ) and health (see also Fig 2).

**Multiple mean comparisons.** In line with our assumptions, patients with eustress-endurance and those with low-endurance responses showed lower levels of life stress, maladaptive coping, depression, and a better health state, as well as higher levels of failure-related action orientation and physical activity compared to patients with distress-avoidance responses. Moreover, eustress-endurance responders reported the highest levels of adaptive coping and

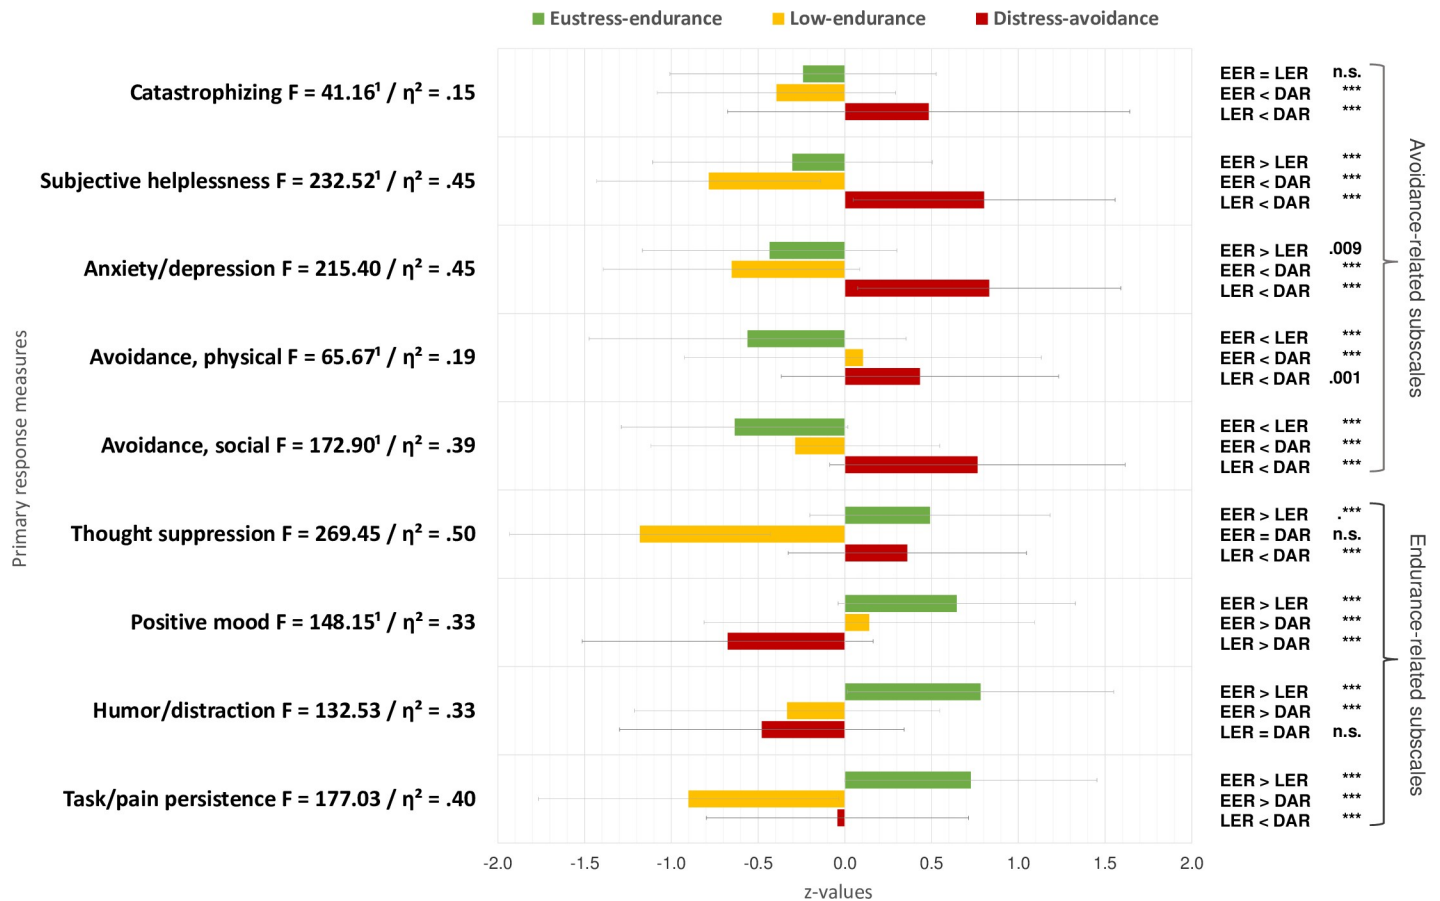

**Fig 1. Z-standardized means, standard deviations, overall (ANOVAs) and multiple mean comparisons of pain response profiles on primary response measures.** Note:  $n_{EER} = 187, 35\%$ ,  $n_{LER} = 141, 26\%$ ,  $n_{DAR} = 208, 39\%$ ; EER = Eustress-endurance, LER = Low-endurance, DAR = Distress-avoidance responders; <sup>1</sup> = Welch test; all overall  $p < .001$ ; \*\*\* =  $p < .001$ ;  $\eta^2$  classification of effect sizes by Cohen (1988):  $\eta^2 = .01$ , small,  $\eta^2 = .06$ , medium,  $\eta^2 = .14$ , large.

<https://doi.org/10.1371/journal.pone.0248875.g001>

physical activity compared to both other profiles ( $p_{EER > DAR} = .000$ ,  $p_{EER > LER} = .023$ ), whereas low-endurance responders did not differ in their levels of physical activity compared to distress-avoidance responders [ $M (SD)$ : EER = 9.46 (5.59), LER = 8.02 (6.11), DAR = 6.87 (5.36)]. Against our assumptions, patients with low- endurance responses showed (one of) the lowest levels of adaptive coping (i.e., subjective competence and cognitive restructuring), similar to patients with distress-avoidance responses.

**Table 5. LPA model fit summary for the three-profile solution (model 3) with four covariates including p-values from logistic regression analysis.**

| Covariate | Log likelihood | AIC      | BIC      | SABIC    | Entropy | Smallest class % | P       | P       | P       |
|-----------|----------------|----------|----------|----------|---------|------------------|---------|---------|---------|
|           |                |          |          |          |         |                  | EER-LER | EER-DAR | LER-DAR |
| Pain      | -6852.32       | 13784.63 | 13956.00 | 13829.02 | 0.80    | 25               | .025    | .002    | ***     |
| LS        | -6833.19       | 13746.38 | 13917.74 | 13790.77 | 0.80    | 27               | .004    | ***     | ***     |
| AOF       | -6830.27       | 13740.54 | 13911.90 | 13784.93 | 0.80    | 26               | n.s.    | ***     | ***     |
| AOP       | -6850.39       | 13780.79 | 13952.15 | 13825.18 | 0.81    | 27               | n.s.    | ***     | ***     |

Note.  $n = 536$ ; LPA = latent profile analysis; AIC = Akaike’s Information Criterion; BIC = Bayesian Information Criterion; SABIC = Sample-Adjusted BIC; LS = life stress, AOF = failure-related action orientation, AOP = prospective action orientation;  $p = p$ -value  
 \*\*\* =  $p < .001$ .

<https://doi.org/10.1371/journal.pone.0248875.t005>

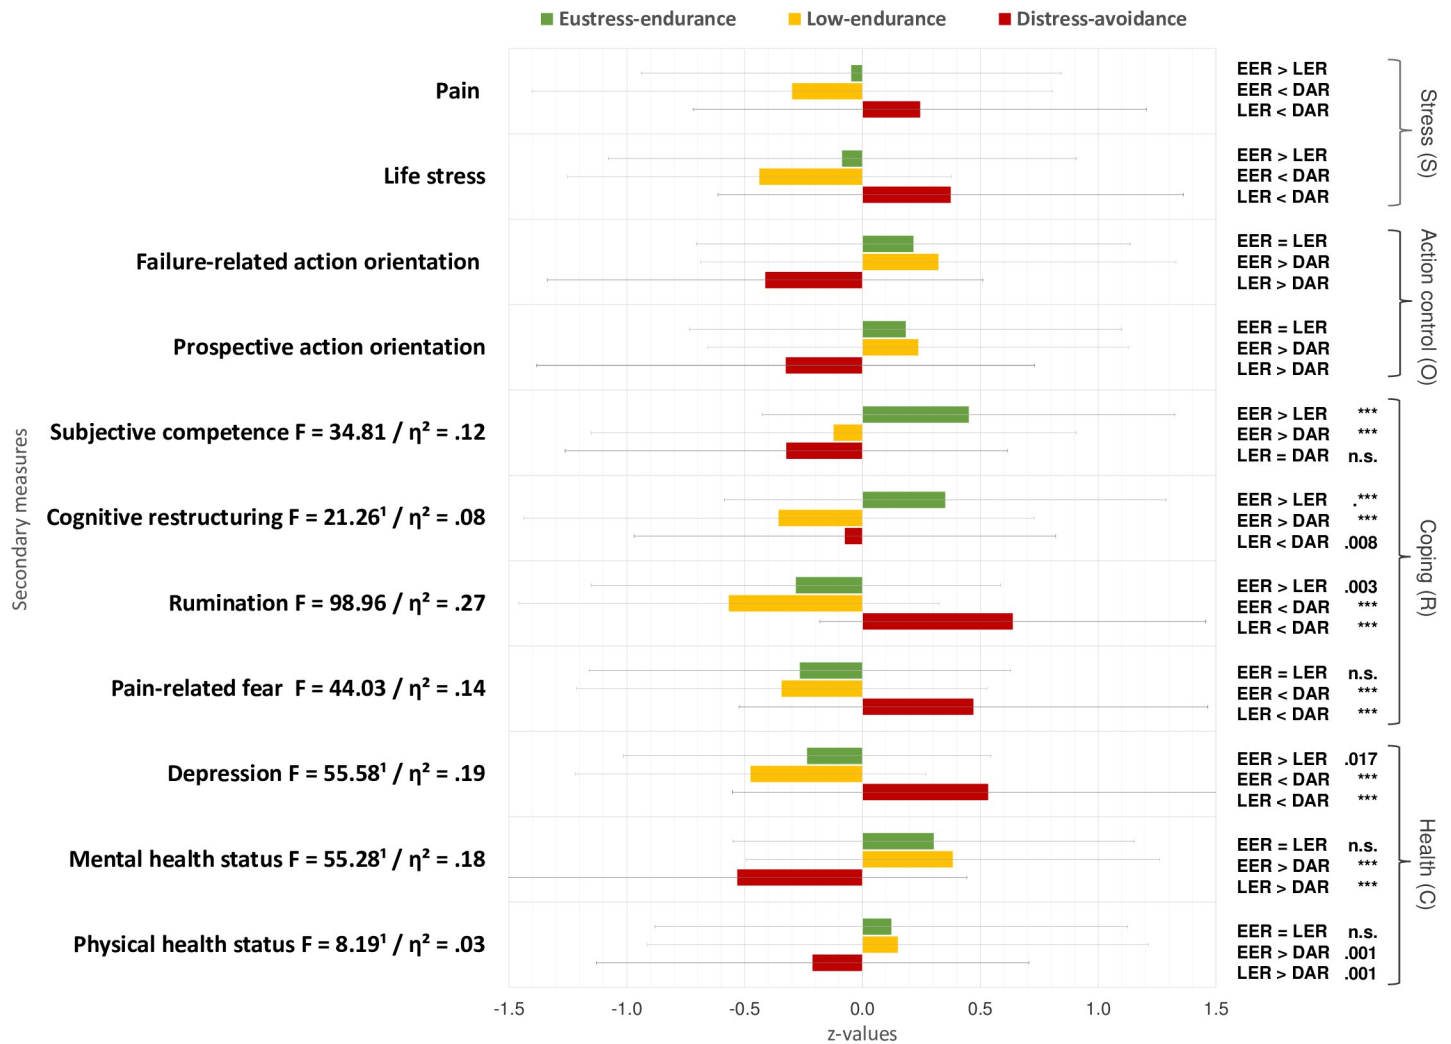

**Fig 2. Z-standardized means, standard deviations, overall (ANOVAs) and pairwise mean comparisons of pain response profiles on secondary measures.** Note: EER = Eustress-endurance, LER = Low-endurance, DAR = Distress-avoidance responders; <sup>1</sup> = Welsh test; all overall  $p < .001$ ; \*\*\* =  $p < .001$ ;  $\eta^2$  classification of effect sizes by Cohen [88]:  $\eta^2 = .01$ , small,  $\eta^2 = .06$ , medium,  $\eta^2 = .14$ , large effect.

<https://doi.org/10.1371/journal.pone.0248875.g002>

## Discussion

To our knowledge, this is the first study that aimed to replicate FAM-/AEM-like pain response patterns in patients with chronic non-specific low back pain by means of latent profile analysis, and validated pain response profiles by using measures of stress, action control, coping and health. Results were partly consistent with prior cluster-analytical studies, as well as the Fear-Avoidance Model (FAM) and Avoidance-Endurance Model (AEM). However, in line with Action Control Theory (ACT), findings also extend prior research in terms of a new endurance-avoidance typology (EAT).

### Characteristics of FAM-/AEM-like pain response profiles

Partially in line with FAM and/or AEM, we found two distinct opposite pain response profiles of distress-avoidance and eustress-endurance responses, and one partially opposite profile of low-avoidance-endurance responses:

1. *Distress-avoidance responses (DAR)* with higher levels of avoidance, medium to higher levels of distress-endurance, and mostly lower levels of eustress-endurance responses,
2. *Eustress-endurance responses (EER)* with higher levels of eustress-/endurance responses, and lower to medium levels of avoidance responses,
3. *Low- endurance responses (LER)* with lower to medium levels of avoidance, and lower levels of endurance responses.

Similar to clusters of depressive avoidance responders, mixed, or extreme cyclers, which were found in prior cluster-analytical studies [16–19], only one compound profile of mixed distress-avoidance responders (DAR) consistently emerged that showed both higher levels of fear-avoidance and medium levels of distress-endurance responses as compared to both other response profiles. Against our assumptions according to the FAM and AEM, we did not find a distinct profile of pure fear-avoidance responses. This is a new finding, which was not reported in previous traditional cluster-analytical studies based on subscales of the Avoidance-Endurance Questionnaire [14,15].

Noteworthy, we found that life stress-related measures of threats and demands as potential triggers of fear-avoidance and distress-endurance responses were highly intercorrelated in the current sample of patients with chronic low back pain (see S2 Table). Presumably, recurring pain as an archetypical aversive stressor is both threatening (because it normally signals harm) and demanding (because it interrupts ongoing activities and demands attention) (see also [89,90]). In the course of pain chronification, it may increasingly threaten an individual's health needs and work/life goals. Likewise, the challenges and demands to fulfill health needs and attain personal work/life goals also increase with elevated pain and pain-related disability. In addition, chronic pain may induce inner conflicts between individual health needs (e.g., reducing pain by reducing activity) and work/life goals (e.g., persisting and reaching personal goals in spite of pain).

Beyond the FAM and AEM, this supports the assumption that the paths explaining the development and maintenance of chronic pain through (partial or graded) *disuse/deconditioning* and *misuse/overload* and associated avoidance-endurance responses are multiply interconnected and reinforcing each other. Basically, this may be the case because individuals differ in their self-regulatory ability (i.e., their action vs. state orientation) to flexibly cope with pain- and work-related life stress, unrealistic intentions as well as conflicts in a balanced and sustainable manner [20,22,41,50]. Importantly, this also provides more individual explanations for some of the inconsistent findings questioning the FAM. For example, there is little evidence for general disuse and physical deconditioning among patients with chronic low back pain compared to healthy control groups [28,35,36]. However, when pain patients show periods of reduced activity and avoidance of specific movements as compared to their former habitual activity levels, this may at least reduce their physical fitness and (muscle-specific) load-bearing capacity in relation to their former individual work load and regular occupational demands (in contrast to excessive general disuse and deconditioning as proposed by the FAM). As a consequence, when patients try to face again their individual daily life challenges and occupational work load as usual (in contrast to excessive misuse as proposed by the AEM), they probably overload their muscles and other soft tissues, leading to new (micro-)injuries, increased pain and disability.

Partially in line with mixed distress-endurance responses (DER) as proposed by the AEM, and according to Action Control Theory, our finding of distress-avoidance responses (DAR) thus suggest that at least short reactance periods of increased efforts to endure in habitual work load and persist in ongoing activities despite pain may intermingle with avoidance of

pain-related movements and reduced activity in terms of fight-or-flight/freezing responses [20,21,39]. These, however, may primarily be based on avoidance motivation (e.g., avoiding conflicts, pain/-related threats, or a loss of control over work-related demands) accompanied by a stress-dependent loss of volitional top-down control [21,41]. This loss of top-down control is characterized by a regression to more rigid forms of low-level processing such as coping based on habitual, impulsive, or conditioned stimulus-response connections as it was suggested for state- (vs. action-) oriented individuals in the face of increased life stress [20,47,50,62]. This is in line with other research suggesting that thought suppression associated with endurance responses despite pain may reflect attempts to control or avoid unwanted thoughts and is often followed by rebound effects (i.e., counter-intentional intrusions of unwanted thoughts), especially under demanding conditions [91,92].

In contrast, positive feedback and self-affirmation were shown to eliminate rebound effects [93]. This may be especially the case in eustress-endurance responders (EER), who consistently showed equal levels of thought suppression compared to distress-avoidance responders as well as the highest levels of positive mood, humor/distraction, task persistence, and subjective competence compared to both other response types. According to Action Control Theory, findings suggest that pro-/active, more successful suppression and distraction efforts in action-oriented eustress-endurance responders may be a consequence of better emotion regulation, and attentional disengagement, positive emotions facilitating the enactment of difficult intentions and cognitive or automatic goal shielding against counter-intentional impulses and action alternatives [21,22,39,61,70,94]. Volitional facilitation of difficult intentions in action- as compared to state-oriented individuals, for example, was shown as a consequence of positive primes in Stroop experiments, which were especially related to achievement motivation [70,95]. This suggests that more action-oriented eustress-endurance responders may better maintain top-down control under increased pain-related demands resulting in more successful suppression and distraction efforts. Further research, however, is needed to confirm these hypotheses.

### Differences between pain response profiles in secondary measures

Mostly as expected, patients with distress-avoidance responses (DAR) emerged as the patient group with the most severe levels of stress, maladaptive coping, and bad health. This is largely in line with meta-analytical data concerning the impact of activity avoidance on pain and (psychological) functioning as well as other cluster-analytical studies that also identified avoidance responders, mixed, or extreme cyclers as (one of) the most dysfunctional patient groups [15–19,23].

Moreover, in line with Action Control Theory, distress-avoidance responders emerged as the most state-oriented patient group. One the one hand, this was indicated for failure-related action (vs. state) orientation, which captures the ability to down-regulate negative emotions through self-relaxation and disengage from unrealistic intentions and unwanted negative thoughts [57,58,63,67]. The inability to down-regulate negative emotions further is associated with reduced access to personal preferences and self-representations, which is a prerequisite for self-coherent decisions, self-confrontational coping, and mental health [47,50,55,96]. This predisposes individuals with distress-avoidance responses to suffer from pain-related fear/anxiety, hypervigilance, uncontrollable rumination, and helplessness, but also from the consequences of excessive overactivity and frequent failure to perform coping activities that satisfy their needs (alienation) [20,22,41,54].

Prior research additionally supports the assumption of an impaired balance between maintenance of and disengagement from intentions in state-oriented patients with distress-avoidance responses: State orientation was shown to be an organismic risk factor that mutually

aggravates deficits in motivation and performance: introjection of social expectations and norms, memory deficits, dissociations between cognitive and emotional preferences, over-activation of intentions, and rigidity against situational changes as well as cognitive and behavioral overactivity [20,22,54,60,68,97,98]. Furthermore, and in line with our results, state orientation was shown to be associated with poor adjustment to chronic pain, helplessness, distress, and depression [20,54,98–102].

One the other hand, we found differences between the pain response profiles in prospective action versus state orientation. Moreover, in comparison to the both other response profiles, patients with distress-avoidance responses suffer from higher levels of pain, life stress, and help-/hopelessness as well as lower health. This may indicate or be a consequence of prolonged exposure to uncontrollable aversive events that may increasingly eliminate perceived action alternatives to successfully cope with pain [50,54,69]. Thus, the ability to up-regulate positive emotions (i.e., self-motivation) and initiate difficult intentions despite pain- and work-related life stress seems most required in patients with distress-endurance responses. Importantly, prospective state orientation may contribute to a lack of initiative in the face of repeated (pain-related) interruptions of ongoing activities and depleted action-facilitating positive emotions [20,47,103]. Hence, apart from fear/anxiety-based escape/avoidance behavior, prospective state orientation may (additionally) reduce pro-/active coping and physical activity, especially in distress-avoidance versus eustress-endurance responders. Likewise, the associated symptoms of procrastination and passivity may be another explanation for the findings that patient groups with diverse (partially confounded) avoidance and/or endurance responses often do not differ from each other in diverse measures of physical activity and/or deconditioning [15,16,43,104].

In comparison to distress-avoidance responders, the findings of more action-oriented eustress-endurance responders (EER; sometimes termed as *doers* or *persistent patients* in other cluster-analytical studies [15,16,18,19]) showed significantly lower levels of life stress, better coping and health. This finding is in line with both FAM and Action Control Theory that propose adaptive patterns of no-fear (self-)confrontational (coping) responses to pain and life stress [25,50]. Consistent with these assumptions, research has found action (vs. state) orientation and eustress-/endurance (vs. distress-/avoidance) responses to be resilience factors, associated with better self/emotion regulation, stress resistance, self-efficacy, health, recovery and/or therapy prognosis [15,16,19,20,22,24,48,51,53,63,65,72,99,105–108]. Thus, in contrast to the assumptions of the AEM, eustress-/endurance responses may not be (longitudinally) dysfunctional as long as they are associated with (action-oriented) flexible goal adjustment and attainment of salient non-pain related goals [17,22,54,109–111]. Together, this can be mostly observed also in the patterns of correlations between action versus state orientation, primary and other secondary measures (see [S2 Table](#)).

Likewise, higher levels of endurance responses despite pain may not necessarily indicate overactivity or an imbalance between activity and relaxation [15]. In line with other research, our results rather suggest a more functional approach, which differentiates between more rigid reactive (or “regressive”) versus more flexible proactive (or “progressive”) endurance responses. Whereas reactive pain-related goal pursuit and excessive or pain-contingent persistence were associated with more pain and/or lower health, proactive non-pain goal pursuit and task-contingent persistence were associated with less pain and/or better health [22,23,111,112]. Consistently, task/pain persistence revealed zero correlations with action versus state orientation, physical activity, and mental health (see also [S2 Table](#)).

Finally, patients with low-endurance responses (LER) showed lower or equal levels of stress, action versus state orientation, maladaptive coping, and health compared to patients with eustress-endurance responses. Moreover, patients with low-endurance responses reported lower



levels of stress, state orientation, maladaptive coping, and health compared to patients with distress-avoidance responses. These findings mostly are in line with our assumptions according to the AEM and/or Action Control Theory, as well as associated research, and suggest a pattern of low-risk-related pain responses, similar to pacing [16,19,20,22,24,26]. Patients with low-endurance responses, however, showed equal or even lower levels of subjective competence and cognitive restructuring compared to distress-avoidance responders. In line with other studies [17,112], this finding contradicts AEM's assumptions of low-endurance responses/pacing to be a distinct pattern of adaptive pain responses in contrast to both other profiles, at least assessed in patients before an intervention.

Alternatively, in line with our hypotheses according to Action Control Theory, low-endurance responses also may be a result of lower levels of pain- and work-related life stress (i.e., perceived threats and demands). Moreover, the formation and efficacy of low-/avoidance-endurance responses at varying levels of life stress may depend on individual action versus state orientation (e.g., [22,47,50]). Likewise, cognitive-behavioral measures alone may not sufficiently depict a context-adequate balance between activity and relaxation. In line with this notion, McCracken and Samuel [16] as well as Kindermans et al. [112] reported zero or even positive relations between (partially avoidant) activity pacing and depression and/or disability. This suggests a more functional approach to more precisely measuring adaptive pacing in contrast to avoidance by considering action control in the context of varying life stress.

Consistent with Action Control Theory, our results suggest that, at lower levels of pain and life stress, more action-oriented patients with low-endurance responses can better self-regulate their emotions, as well as disengage from unattainable or detrimental goals and failure-related rumination than do patients with distress-avoidance responses. They showed at least similar self-regulatory abilities compared to eustress-endurance responders, who, however, perceive higher levels of pain and life stress. High(er) levels of action orientation at lower levels of (pain-related) life stress result in lower levels of helplessness and depression [20].

However, pain and life stress may vary for each individual and therefore bears the risk that people may temporarily be overwhelmed by unexpected higher levels of pain and life stress, associated with a loss of top-down control and lower levels of subjective competence [22,50]. Moreover, stress-dependent regression to lower levels of control means, for example, that less flexible automatized habits, passive or conditioned avoidance responses dominate emotion regulation and coping attempts instead of initiating more difficult intentions to actively cope with pain-related life stress (e.g., to get more physically active and/or distract from pain) [47,50]. A lower flexibility and (long-term) efficiency of patients' automatized pain responses, and self-/emotion regulation (e.g., pain-contingent activity avoidance vs. flexible persistence and humor/distraction) may additionally contribute to lower subjective competence in low-endurance responders as compared to more active and committed eustress-endurance responders [50,109].

Against this background, the adaptiveness of pacing strategies in the context of varying pain and life stress appears to be a consequence of the efficiency of individual coping habits as well as an adequate balance between intentional maintenance and disengagement facilitated by action (vs. state) orientation [20,22,47,50,67,72]. Future research may address these assumptions on the individual level by considering the role of diathesis-stress interactions in the development of different pain responses with varying degrees of adaptiveness.

## Limitations

Our study was cross-sectional. Therefore, we cannot make any causal conclusions but only generate new hypotheses about the underlying mechanisms of symptom formation. These hypotheses have to be confirmed in future studies. The generalizability of our findings may be

limited due to a non-random sample and the exclusion criteria of the primary study that excluded patients with major depression [1]. Results of latent profile analyses further depend on the specific characteristics of analyzed samples and input variables. Thus, results are limited to the population of patients with chronic low back pain and the input measures of the Avoidance-Endurance Questionnaire (AEQ). Further confirmatory research is needed to replicate results, vary and optimize measurements, examine differences between and stability of pain response profiles, and use experimental designs to study underlying mechanisms of symptom chronification and recovery.

### Implications for treatment

In line with other research, our results suggest tailoring of (multiprofessional) interventions based on behavioral and functional analysis of avoidance-endurance responses in order to more effectively improve patients' quality of life [1,16,22,54,113,114]. More action-oriented patients with eustress-endurance and low-endurance, and most state-oriented patients with distress-avoidance responses demonstrated increasing needs to reduce life stress and improve action control, coping, and health. Distress-avoidance responders may need the most intensive treatment, e.g. mobilizing inpatient rehabilitation programs in combination with after-care to maintain treatment effects. In contrast, eustress-endurance and low-endurance responders may need less intensive treatment to improve coping (abilities) and stabilize patients' adjustment. Apart from an emerging paradigm shift to the biopsychosocial model and process-based therapy, scientists and clinicians may further develop and evaluate new (interdisciplinary) treatment concepts by considering Action Control Theory [1,47,59,69,106,115]. The measurement of action versus state orientation is recommended (cf.). Diagnostics may additionally reveal frustration of basic needs, discrepancies between explicit goals and implicit motives, cognitive and emotional fixations, and deficits in self-regulatory competencies, which can become subject of individualized therapy and counseling concepts [47,69,74,116,117].

### Conclusions

Our study revealed a new endurance-avoidance typology that was not found in prior studies. We consistently found two distinct, opposite profiles of either distress-avoidance or eustress-endurance responses, and one less distinct and less opposite profile of low-endurance responses in patients with chronic non-specific low back pain. Patients with distress-avoidance responses emerged as the most burdened, dysfunctional patient group concerning measures of stress, action control, maladaptive coping, and health. Compared to both other response profiles, patients with eustress-endurance responses showed one of the highest levels of action versus state orientation, and the highest levels of physical activity. Patients with low-endurance responses reported lower or equal levels of stress, action versus state orientation, maladaptive coping, and health compared to patients with eustress-endurance responses as well as lower or equal low levels of adaptive coping compared to patients with distress-avoidance responses. Results suggest action orientation to be an organismic resilience factor in eustress-endurance and low-endurance responders and state orientation to be an organismic risk factor, especially in distress-avoidance responders. Thereby, the application of Action Control Theory may improve the understanding of various (inconsistent) findings associated with the FAM and AEM as well as the effectiveness of therapy in patients with chronic low back pain.

### Supporting information

**S1 Table. Bivariate correlations between primary AEQ response measures.** Note. AEQ = Avoidance-Endurance Questionnaire; Avoidance-related subscales:

C = catastrophizing, HH = help-/hopelessness, AD = anxiety/depression, AP = avoidance of physical activity, AS = avoidance of social activity; Endurance-related subscales: TS = thought suppression, PM = positive mood, HD = humor/distraction, PP = task/pain persistence;  $p = p$ -value, \*\* =  $p < .01$ , \* =  $p < .05$ ;  $r$  classification of magnitude by Cohen (1988):  $r = .10$  small,  $r = .30$ , medium,  $r = .50$ , large correlation.

(DOCX)

**S2 Table. Bivariate correlations between primary and secondary measures.** Note. *Primary response measures:* C = catastrophizing, HH = help-/helplessness, AD = anxiety/depression, AP = avoidance of physical activity, AS = avoidance of social activity, TS = thought suppression, PM = positive mood, HD = humor/distraction, PP = task/pain persistence; *Secondary measures:* P = pain, LS = life stress; AOF = failure-related action orientation, AOP = prospective action orientation; SC = subjective competence, CR = cognitive restructuring, PF = pain-related fear (somatic focus), PA = physical activity; D = depression, MH = mental health status, PH = physical health status;  $p = p$ -value, \*\*\* =  $p < .001$ ;  $r$  classification of magnitude by Cohen (1988)  $r = .10$ , small,  $r = .30$ , medium,  $r = .50$ , large correlation.

(DOCX)

**S3 Table. Means and standard deviations of pain response profiles in secondary measures.**

Note: M = unstandardized mean, SD = standard deviation; EER = Eustress-endurance, LER = Low-endurance, DAR = Distress-avoidance responders.

(DOCX)

## Acknowledgments

The authors wish to thank Elisabeth Trempa, Michael Schuler, Silke Neudert and others for helpful comments on a previous draft of the manuscript, as well as the clinics, patients, and students, who participated in the primary study.

## Author Contributions

**Conceptualization:** Jana Buchmann, Nicola Baumann, Karin Meng, Jana Semrau, Julius Kuhl, Klaus Pfeifer, Miguel Kazén, Heiner Vogel, Hermann Faller.

**Data curation:** Jana Buchmann, Karin Meng, Jana Semrau, Klaus Pfeifer.

**Formal analysis:** Jana Buchmann.

**Funding acquisition:** Jana Buchmann, Nicola Baumann, Jana Semrau, Klaus Pfeifer, Heiner Vogel.

**Investigation:** Jana Buchmann, Karin Meng, Jana Semrau.

**Methodology:** Jana Buchmann, Karin Meng, Klaus Pfeifer, Hermann Faller.

**Project administration:** Nicola Baumann, Karin Meng, Julius Kuhl, Klaus Pfeifer, Hermann Faller.

**Resources:** Jana Buchmann, Karin Meng, Jana Semrau.

**Supervision:** Nicola Baumann, Karin Meng, Julius Kuhl, Klaus Pfeifer, Miguel Kazén, Heiner Vogel, Hermann Faller.

**Validation:** Jana Buchmann, Karin Meng, Jana Semrau, Klaus Pfeifer, Hermann Faller.

**Writing – original draft:** Jana Buchmann.

**Writing – review & editing:** Jana Buchmann, Nicola Baumann, Karin Meng, Jana Semrau, Julius Kuhl, Klaus Pfeifer, Miguel Kazén, Heiner Vogel, Hermann Faller.

## References

1. Semrau J, Hentschke C, Buchmann J, Meng K, Vogel H, Faller H, et al. Long-term effects of interprofessional biopsychosocial rehabilitation for adults with chronic non-specific low back pain: A multicentre, quasi-experimental study. *PLoS ONE*. 2015; 10(3), <https://doi.org/10.1371/journal.pone.0118609> PMID: 25768735
2. Vos T, Flaxman AD, Naghavi M, Lozano R, Michaud C, Ezzati M, et al. Years lived with disability (YLDs) for 1160 sequelae of 289 diseases and injuries 1990–2013: a systematic analysis for the Global Burden of Disease Study 2010. *The Lancet*. 2012; 380(9859): 2163–96, [https://doi.org/10.1016/S0140-6736\(12\)61729-2](https://doi.org/10.1016/S0140-6736(12)61729-2) PMID: 23245607
3. Balagué F, Mannion AF, Pellisé F, Cedraschi C. Non-specific low back pain. *The Lancet*. 2012; 379(9814): 482–91, [https://doi.org/10.1016/S0140-6736\(11\)60610-7](https://doi.org/10.1016/S0140-6736(11)60610-7) PMID: 21982256
4. O’Sullivan PB, Caneiro JP, O’Keeffe M, Smith A, Dankaerts W, Fersum K, et al. Cognitive functional therapy: An integrated behavioral approach for the targeted management of disabling low back pain. *Phys Ther*. 2018; 98(5): 408–23, <https://doi.org/10.1093/ptj/pzy022> PMID: 29669082
5. Turk DC. The potential of treatment matching for subgroups of patients with chronic pain: lumping versus splitting. *Clin J Pain*. 2005; 21(1): 44–55, <https://doi.org/10.1097/00002508-200501000-00006> PMID: 15599131
6. Bradley LA, Prokop CK, Margolis R, Gentry WD. Multivariate analyses of the MMPI profiles of low back pain patients. *J BehavMed*. 1978; 1(3): 253–72, <https://doi.org/10.1007/BF00846678> PMID: 158659
7. Armentrout DP, Moore JE, Parker JC, Hewett JE, Feltz C. Pain-patient MMPI subgroups: The psychological dimensions of pain. *J BehavMed*. 1982; 5(2): 201–11, <https://doi.org/10.1007/BF00844809> PMID: 6215494
8. Jamison RN, Rock DL, Parris WCV. Empirically derived Symptom Checklist 90 subgroups of chronic pain patients: A cluster analysis. *J Behav Med*. 1988; 11(2): 147–58, <https://doi.org/10.1007/BF00848262> PMID: 3172188
9. Turk DC, Rudy TE. Toward an empirically derived taxonomy of chronic pain patients: Integration of psychological assessment data. *J Consul Clin Psychol*. 1988; 56(2): 233–8, <https://doi.org/10.1037//0022-006x.56.2.233> PMID: 3372831
10. Williams DA, Keefe FJ. Pain beliefs and the use of cognitive-behavioral coping strategies. *Pain*. 1991; 46(2): 185–90, [https://doi.org/10.1016/0304-3959\(91\)90074-8](https://doi.org/10.1016/0304-3959(91)90074-8) PMID: 1749641
11. Sheffer CE, Deisinger JA, Cassisi JE, Lofland K. A revised taxonomy of patients with chronic pain. *Pain Med*. 2007; 8(4): 312–25, <https://doi.org/10.1111/j.1526-4637.2006.00176.x> PMID: 17610453
12. Girona RJ, Clark ME. Cluster analysis of the Pain Outcomes Questionnaire. *Pain Med*. 2008; 9(7): 813–23, <https://doi.org/10.1111/j.1526-4637.2007.00397.x> PMID: 18266813
13. Mehta S, Rice D, McIntyre A, Getty H, Speechley M, Sequeira K, et al. Identification and characterization of unique subgroups of chronic pain individuals with dispositional personality traits. *Pain Res Manag*. 2016; 5187631, <https://doi.org/10.1155/2016/5187631> PMID: 27445616
14. Grebner M, Breme K, Rothoerl R, Woertgen C, Hartmann A, Thomé C. [Coping and convalescence course after lumbar disk operations]. *Schmerz*. 1999; 13(1): 19–30. German, <https://doi.org/10.1007/s004829900011> PMID: 12799946
15. Fehrmann E, Tüchler K, Kienbacher T, Mair P, Spreitzer J, Fischer L, et al. Comparisons in muscle function and training rehabilitation outcomes between avoidance-endurance model subgroups. *Clin J Pain*. 2017; 33: 912–20, <https://doi.org/10.1097/AJP.0000000000000479> PMID: 28118259
16. McCracken LM, Samuel VM. The role of avoidance, pacing, and other activity patterns in chronic pain. *Pain*. 2007; 130(1–2): 119–25, <https://doi.org/10.1016/j.pain.2006.11.016> PMID: 17240065
17. Esteve R, López-Martínez AE, Peters ML, Serrano-Ibáñez ER, Ruíz-Párraga GT, González-Gómez H, et al. Activity pattern profiles: relationship with affect, daily functioning, impairment, and variables related to life goals. *J Pain*. 2017; 18(5): 546–55, <https://doi.org/10.1016/j.jpain.2016.12.013> PMID: 28063959
18. Holldorf M, Morfeld M, Möller M, Höder J, Koch U. [Chronic low back pain: replication of reaction differing groups]. *Schmerz*. 2010; 24: 334–41. German, <https://doi.org/10.1007/s00482-010-0944-9> PMID: 20658251

19. Cane D, Nielson WR, Mazmanian D. Patterns of pain-related activity: replicability, treatment-related changes, and relationship to functioning. *Pain*. 2018; 159(12): 2522–9. <https://doi.org/10.1097/j.pain.0000000000001357> PMID: 30074594
20. Kuhl J, Beckmann J. Volition and personality: Action versus state orientation. Göttingen: Hogrefe; 1994.
21. Kuhl J, Koole SL. The functional architecture of approach and avoidance motivation. In: Elliot AJ, editor. *Handbook of approach and avoidance motivation*. New York: Psychology Press; 2008. p. 535–53.
22. Kuhl J. Motivationstheoretische Aspekte der Depressionsgenese: Der Einfluss der Lageorientierung auf Schmerzempfinden, Medikamentenkonsum und Handlungskontrolle [Motivational aspects in the etiology of depression: The influence of state-orientation on pain perception, drug consumption, and action control]. In: Wolfersdorf MG, Straub R, Hole G, editors. *Depressiv Kranke in der Psychiatrischen Klinik. Zur Theorie und Praxis von Diagnostik und Therapie*. Regensburg: Roderer; 1983. p. 411–24.
23. Andrews NE, Strong J, Meredith PJ. Activity pacing, avoidance, endurance, and associations with patient functioning in chronic pain: a systematic review and meta-analysis. *Arch Phys Med Rehabil*. 2012; 93(11): 2109–21. <https://doi.org/10.1016/j.apmr.2012.05.029> PMID: 22728699
24. Scholich SL, Hallner D, Wittenberg RH, Rusu AC, Hasenbring MI. [Pain response pattern in chronic low back pain pilot study. The influence of avoidance-endurance model patterns on quality of life, pain intensity and disability]. *Der Schmerz*. 2011; 25(2): 184–90. German. <https://doi.org/10.1007/s00482-011-1023-6> PMID: 21424334
25. Vlaeyen JWS, Linton SJ. Fear-avoidance and its consequences in chronic musculoskeletal pain: A state of the art. *Pain*. 2000; 85(3): 317–32. [https://doi.org/10.1016/S0304-3959\(99\)00242-0](https://doi.org/10.1016/S0304-3959(99)00242-0) PMID: 10781906
26. Hasenbring MI, Verbunt JA. Fear-avoidance and endurance-related responses to pain: New models of behavior and their consequences for clinical practice. *Clin J Pain*. 2010; 26(9): 747–53. <https://doi.org/10.1097/AJP.0b013e3181e104f2> PMID: 20664333
27. Leeuw M, Goossens MEJB, Linton SJ, Crombez G, Boersma K, Vlaeyen JWS. The fear-avoidance model of musculoskeletal pain: current state of scientific evidence. *J Behav Med*. 2007; 30(1): 77–94. <https://doi.org/10.1007/s10865-006-9085-0> PMID: 17180640
28. Verbunt JA, Seelen HA, Vlaeyen JWS, van de Heijden GJ, Heuts PH, Pons K, et al. Disuse and deconditioning in chronic low back pain: Concepts and hypotheses on contributing mechanisms. *Eur J Pain*. 2003; 7(1): 9–21. [https://doi.org/10.1016/s1090-3801\(02\)00071-x](https://doi.org/10.1016/s1090-3801(02)00071-x) PMID: 12527313
29. Asmundson GJ, Parkerson HA, Petter M, Noel M. What is the role of fear and escape/avoidance in chronic pain? Models, structural analysis and future directions. *Pain Manag*. 2012; 2(3): 295–303. <https://doi.org/10.2217/pmt.12.15> PMID: 24654671
30. Campbell CM, Quartana PJ, Buenaver LF, Haythornthwaite JA, Edwards RR. Changes in situation-specific pain catastrophizing precede changes in pain report during capsaicin pain: a cross-lagged panel analysis among healthy, pain-free participants. *J Pain*. 2010; 11(9): 876–84. <https://doi.org/10.1016/j.jpain.2009.12.007> PMID: 20488760
31. Crombez G, Vlaeyen JWS, Heuts PH, Lysens R. Pain-related fear is more disabling than pain itself: evidence on the role of pain-related fear in chronic back pain disability. *Pain*. 1999; 80(1–2): 329–39. [https://doi.org/10.1016/s0304-3959\(98\)00229-2](https://doi.org/10.1016/s0304-3959(98)00229-2) PMID: 10204746
32. Vlaeyen JWS, Kole-Snijders AMJ, Boeren RGB, van Eek H. Fear of movement/(re)injury in chronic low back pain and its relation to behavioral performance. *Pain*. 1995; 62(3): 363–72. [https://doi.org/10.1016/0304-3959\(94\)00279-N](https://doi.org/10.1016/0304-3959(94)00279-N) PMID: 8657437
33. Wideman TH, Sullivan MJ. Differential predictors of the long-term levels of pain intensity, work disability, healthcare use, and medication use in a sample of workers' compensation claimants. *Pain*. 2011; 152(2): 376–83. <https://doi.org/10.1016/j.pain.2010.10.044> PMID: 21147513
34. Smeets RJ, van Geel KD, Verbunt JA. Is the fear avoidance model associated with the reduced level of aerobic fitness in patients with chronic low back pain? *Arch Phys Med Rehabil*. 2009; 90(1): 109–17. <https://doi.org/10.1016/j.apmr.2008.07.009> PMID: 19154837
35. Smeets RJ, Wade D, Hidding A, Van Leeuwen PJ, Vlaeyen JWS, Knottnerus JA. The association of physical deconditioning and chronic low back pain: a hypothesis-oriented systematic review. *Disabil Rehabil*. 2006; 28(11): 673–93. <https://doi.org/10.1080/09638280500264782> PMID: 16809211
36. Verbunt JA, Smeets RJ, Wittink HM. Cause or effect? Deconditioning and chronic low back pain. *Pain*. 2010; 149(3): 428–30. <https://doi.org/10.1016/j.pain.2010.01.020> PMID: 20153582
37. Bousema EJ, Verbunt JA, Seelen HAM, Vlaeyen JWS, Knottnerus JA. Disuse and physical deconditioning in the first year after the onset of back pain. *Pain*. 2007; 130: 279–86. <https://doi.org/10.1016/j.pain.2007.03.024> PMID: 17467902

38. Pincus T, Vogel S, Burton AK, Santos R, Field AP. Fear avoidance and prognosis in back pain: A systematic review and synthesis of current evidence. *Arthritis Rheum.* 2006; 54: 3999–4010, <https://doi.org/10.1002/art.22273> PMID: 17133530
39. Hasenbring MI, Chehadi O, Titze C, Kreddig N. Fear and anxiety in the transition from acute to chronic pain: There is evidence for endurance besides avoidance. *Pain Manag.* 2014; 4(5): 363–74, <https://doi.org/10.2217/pmt.14.36> PMID: 25350076
40. Hasenbring MI, Hallner D, Rusu AC. Fear-avoidance- and endurance-related responses to pain: development and validation of the Avoidance-Endurance Questionnaire (AEQ). *Eur J Pain.* 2009; 13(6): 620–8, <https://doi.org/10.1016/j.ejpain.2008.11.001> PMID: 19101182
41. Kuhl J, Beckmann J. Alienation: Ignoring one's preferences. In: Kuhl J, Beckmann J, editors. *Volition and personality. Action versus state orientation.* Göttingen: Hogrefe; 1994. p. 375–90.
42. Hasenbring MI, Hallner D, Klasen B, Streitlein-Böhme I, Willburger R, Rusche H. Pain-related avoidance versus endurance in primary care patients with subacute back pain: psychological characteristics and outcome at a 6-month follow-up. *Pain.* 2012; 153(1): 211–7, <https://doi.org/10.1016/j.pain.2011.10.019> PMID: 22093816
43. Hasenbring MI, Plaas H, Fischbein B, Willburger R. The relationship between activity and pain in patients 6 months after lumbar disc surgery: Do pain-related coping modes act as moderator variables? *Eur J Pain.* 2006; 10(8): 701–9, <https://doi.org/10.1016/j.ejpain.2005.11.004> PMID: 16426878
44. Plaas H, Sudhaus S, Willburger R, Hasenbring MI. Physical activity and low back pain: the role of subgroups based on the avoidance-endurance model. *Disabil Rehabil.* 2014; 36(9): 749–55, <https://doi.org/10.3109/09638288.2013.814723> PMID: 23865908
45. Rabey M, Smith A, Kent P, Beales D, Slater H, O'Sullivan P. Chronic low back pain is highly individualised: patterns of classification across three unidimensional subgrouping analyses. *Scand J Pain.* 2019; 19(4), <https://doi.org/10.1515/sjpain-2019-0073> PMID: 31256070
46. Kanfer FH, Reinecker H., Schmelzer D. *Selbstmanagement-Therapie. Ein Lehrbuch für die klinische Praxis [Self-management therapy. A text book for clinical practice].* Berlin: Springer; 1996.
47. Kuhl J. *Motivation und Persönlichkeit. Interaktionen psychischer Systeme [Motivation and personality. Interaction of psychological systems].* Göttingen: Hogrefe; 2001.
48. Jerusalem M, Schwarzer R. Self-efficacy as a resource factor in stress appraisal processes. In: Schwarzer R, editor. *Self-efficacy: thought control of action.* 2nd ed. New York: Routledge; 1994. p. 195–216.
49. Lazarus RS, Folkman S. *Stress, appraisal, and coping.* New York: Springer; 1984.
50. Kuhl J, Quirin M. Seven steps toward freedom and two ways to lose it: Overcoming limitations of intentionality through self-confrontational coping with stress. *Soc Psychol.* 2011; 42(1): 74–84, <https://doi.org/10.1027/1864-9335/a000045>
51. Kupriyanov R, Zhdanov R. The eustress concept: problems and outlooks. *World J Med Sci.* 2014; 11(2): 179–85, <https://doi.org/10.5829/idosi.wjms.2014.11.2.8433>
52. Selye H. *Stress without Distress.* In: Serban G, editor. *Psychopathology of human adaptation.* Boston: Springer; 1976. p. 137–46.
53. Baumann N, Kaschel R, Kuhl J. Striving for unwanted goals: Stress-dependent discrepancies between explicit and implicit achievement motives reduce subjective well-being and increase psychosomatic symptoms. *J Pers Soc Psychol.* 2005; 89(5): 781–99, <https://doi.org/10.1037/0022-3514.89.5.781> PMID: 16351368
54. Kuhl J. Motivational and functional helplessness: The moderating effect of state versus action orientation. *J Pers Soc Psychol.* 1981; 40(1): 155–70, <https://doi.org/10.1037/0022-3514.40.1.155>
55. Kuhl J, Kaschel R. [Alienation as a determinant of symptom formation: Self-regulation of affect and integrative competence]. *Psychol Rundsch.* 2004; 55(2): 61–71. German, <https://doi.org/10.1026/0033-3042.55.2.61>
56. Baumann N, Kaschel R, Kuhl J. Affect sensitivity and affect regulation in dealing with positive and negative affect. *J Res Pers.* 2007; 41(1): 239–48, <https://doi.org/10.1016/j.jrp.2006.05.002>
57. Kuhl J. A theory of action and state orientations. In: Kuhl J, Beckmann J, editors. *Volition and personality: Action versus state orientation.* Göttingen: Hogrefe; 1994. p. 9–46.
58. Kuhl J. Action versus state orientation: Psychometric properties of the Action Control Scale (ACS-90). In: Kuhl J, Beckmann J, editors. *Volition and personality. Action versus state orientation.* Göttingen: Hogrefe; 1994. p. 47–59.
59. Friederichs KM, Kees M-C, Baumann N. When tough gets you going: Action orientation unfolds with difficult intentions and can be fostered by mental contrasting. *Pers Individ Differ.* 2020; 161: 109970, <https://doi.org/10.1016/j.paid.2020.109970>

60. Kazén M, Kaschel R, Kuhl J. Individual differences in intention initiation under demanding conditions: Interactive effects of state vs. action orientation and enactment difficulty. *J Res Pers.* 2008; 42(3): 693–715, <https://doi.org/10.1016/j.jrp.2007.09.005>
61. Jostmann NB, Koole SL. Dealing with high demands: The role of action versus state orientation. In: Hoyle RH, editor. *Handbook of personality and self-regulation.* Chichester: Blackwell Publishing; 2010. p. 332–52.
62. Jostmann NB, Koole SL. On the regulation of cognitive control: Action orientation moderates the impact of high demands in Stroop interference tasks. *J Exp Psychol Gen.* 2007; 136(4): 593–609, <https://doi.org/10.1037/0096-3445.136.4.593> PMID: 17999573
63. Jostmann NB, Koole SL, van der Wulp NY, Fockenberg DA. Subliminal affect regulation: the moderating role of action vs. state orientation. *Eur Psychol.* 2005; 10(3): 209–17, <https://doi.org/10.1027/1016-9040.10.3.209>
64. Beckmann J, Kuhl J. Altering information to gain action control: Functional aspects of human information processing in decision making. *J Res Pers.* 1984; 18(2): 224–37, [https://doi.org/10.1016/0092-6566\(84\)90031-x](https://doi.org/10.1016/0092-6566(84)90031-x)
65. Koole SL, Jostmann NB. Getting a grip on your feelings: Effects of action orientation and external demands on intuitive affect regulation. *J Pers Soc Psychol.* 2004; 87(6): 974–90, <https://doi.org/10.1037/0022-3514.87.6.974> PMID: 15598118
66. Baumann N, Kuhl J. Intuition, affect, and personality: Unconscious coherence judgments and self-regulation of negative affect. *J Pers Soc Psychol.* 2002; 83(5): 1213–23. <https://doi.org/10.1037/0022-3514.83.5.1213> PMID: 12416923
67. Jostmann N, Koole S. When Persistence is Futile: A functional analysis of action orientation and goal disengagement. In: Moskowitz GB, Grant H, editors. *The psychology of goals.* New York: Guilford Press; 2008. p. 337–61. <https://doi.org/10.1111/j.1467-9280.2008.02107.x> PMID: 18466404
68. Kuhl J, Kazén M. Self-discrimination and memory: State orientation and false self-ascription of assigned activities. *J Pers Soc Psychol.* 1994; 66(6): 1103–15. <https://doi.org/10.1037/0022-3514.66.6.1103> PMID: 8046579
69. Kuhl J, Kazén M. Volitional aspects of depression: State orientation and self-discrimination. In: Kuhl J, Beckmann J, editors. *Volition and personality. Action versus state orientation.* Göttingen: Hogrefe; 1994. p. 297–315.
70. Kuhl J, Kazén M. Volitional facilitation of difficult intentions: Joint activation of intention memory and positive affect removes Stroop interference. *J Exp Psychol Gen.* 1999; 128(3): 382–99, <https://doi.org/10.1037/0096-3445.128.3.382>
71. Koole SL, Kuhl J. Dealing with unwanted feelings: The role of affect regulation in volitional action control. In: Shah JY, Gardner WL, editors. *Handbook of motivation science.* New York: Guilford Press; 2008. p. 295–307.
72. Beckmann J, Kellmann M. Self-regulation and recovery: approaching an understanding of the process of recovery from stress. *Psychol Rep.* 2004; 95(3, Pt2): 1135–53, <https://doi.org/10.2466/pr0.95.3f.1135-1153> PMID: 15762394
73. Nagel B, Gerbershagen H, Lindena G, Pflingsten M. [Development and evaluation of the multidimensional German pain questionnaire]. *Schmerz.* 2002; 16: 263–70. German, <https://doi.org/10.1007/s00482-002-0162-1> PMID: 12192435
74. Kuhl J, Fuhrmann A. Decomposing self-regulation and self-control: The Volitional Components Inventory. In: Heckhausen J, Dweck CS, editors. *Motivation and self-regulation across the life span.* New York: Cambridge University Press; 1998. p. 15–49.
75. Geissner E. Fragebogen zur Erfassung der Schmerzverarbeitung (FESV) [Questionnaire for the measurement of pain evaluation (FESV)]. Göttingen: Hogrefe; 2006.
76. Meyer K, Sprott H, Mannion AF. Cross-cultural adaptation, reliability, and validity of the German version of the Pain Catastrophizing Scale. *J Psychosom Res.* 2008; 64(5): 469–78, <https://doi.org/10.1016/j.jpsychores.2007.12.004> PMID: 18440399
77. Rusu AC, Kreddig N, Hallner D, Hülsebusch J, Hasenbring MI. Fear of movement/(Re)injury in low back pain: confirmatory validation of a German version of the Tampa Scale for Kinesiophobia. *BMC Musculoskelet Disord.* 2014; 15: 280, <https://doi.org/10.1186/1471-2474-15-280> PMID: 25138111
78. Frey I, Berg A, Grathwohl D, Keul J. [Freiburg Questionnaire for physical activity—development, validation and application]. *Soz Präventivmed.* 1999; 44: 55–64. German, <https://doi.org/10.1007/BF01667127> PMID: 10407953
79. Kroenke K, Spitzer RL. The PHQ-9: A new depression diagnostic and severity measure. *Psychiatr Ann.* 2002; 32(9): 509–21, <https://doi.org/10.3928/0048-5713-20020901-06>

80. Ware JJ, Kosinski M, Keller SD. A 12-Item Short-Form Health Survey: construction of scales and preliminary tests of reliability and validity. *Med Care*. 1996; 34(3): 220–33, <https://doi.org/10.1097/00005650-199603000-00003> PMID: 8628042
81. Muthén LK, Muthén BO. *Mplus user's guide*. 7th ed. Low Angeles: Muthén & Muthén; 1998–2012.
82. Lazarsfeld PF, Henry NW. *Latent structure analysis*. New York: Houghton Mifflin; 1968.
83. Gibson WA. Three multivariate models: factor analysis, latent structure analysis, and latent profile analysis. *Psychometrika*. (1959); 24: 229–52.
84. Ferguson SL, Moore EWG, Hull DM. Finding latent groups in observed data: A primer on latent profile analysis in Mplus for applied researchers. *Psychometrika*. 2019; 44(5): 458–68, <https://doi.org/10.1177/0165025419881721>
85. Geiser C. *Data Analysis with Mplus*. New York: Guilford Press; 2013.
86. Muthén BO, Shedden K. Finite mixture modeling with mixture outcomes using the EM algorithm. *Biometrics*. 2004; 55(2): 463–9, <https://doi.org/10.1111/j.0006-341X.1999.00463.x> PMID: 11318201
87. Nylund-Gibson K, Asparouhov T, Muthén BO. Deciding on the number of classes in latent class analysis and growth mixture modeling: a Monte Carlo simulation study. *Struct Equ Modeling*. 2007; 14(4): 535–69, <https://doi.org/10.1080/10705510701575396>
88. Cohen J. *Statistical power analysis for the behavioral sciences*, 2nd ed. Hillsdale: Erlbaum; 1988.
89. Van Damme S, Crombez G, Eccleston C. Coping with pain: A motivational perspective. *Pain*. 2008; 139(1): 1–4, <https://doi.org/10.1016/j.pain.2008.07.022> PMID: 18755548
90. Eccleston C, Crombez G. Pain demands attention: A cognitive–affective model of the interruptive function of pain. *Psychol Bull*. 1999; 125(3): 356–66, <https://doi.org/10.1037/0033-2909.125.3.356> PMID: 10349356
91. Sullivan M, Rouse D, Bishop S, Johnston S. Thought suppression, catastrophizing, and pain. *Cognit Ther Res*. 1997; 21(5): 555–68, <https://doi.org/10.1023/A:1021809519002>
92. Wegner DM. Ironic processes of mental control. *Psychol Rev*. 1994; 101(1): 34–52, <https://doi.org/10.1037/0033-295x.101.1.34> PMID: 8121959
93. Koole SL, van Knippenberg A. Controlling your mind without ironic consequences: Self-affirmation eliminates rebound effects after thought suppression. *J Exp Soc Psychol*. 2007; 43(4): 671–7, <https://doi.org/10.1016/j.jesp.2006.07.001>
94. Ruigendijk HAH, Koole SL. When focusing on a goal interferes with action control: Action versus state orientation and over-maintenance of intentions. *Motiv Emot*. 2014; 38(5): 659–72, <https://doi.org/10.1007/s11031-014-9415-4>
95. Kazén M, Kuhl J. Intention memory and achievement motivation: Volitional facilitation and inhibition as a function of affective contents of need-related stimuli. *J Pers Soc Psychol*. 2005; 89(3): 426–48, <https://doi.org/10.1037/0022-3514.89.3.426> PMID: 16248723
96. Kuhl J, Baumann N. Self-regulation and rumination: Negative affect and impaired self-accessibility. In: Perrig WJ, Grob A, editors. *Control of human behavior, mental processes, and consciousness: Essays in honor of the 60th birthday of August Flammer*. Mahwah: Lawrence Erlbaum Associates Publishers; 2000. p. 283–305.
97. Kazén M, Baumann N, Kuhl J. Self-infiltration vs. self-compatibility checking in dealing with unattractive tasks: The moderating influence of state vs. action orientation. *Motiv Emot*. 2003; 27(3): 157–97, <https://doi.org/10.1023/a:1025043530799>
98. Kuhl J, Helle P. Motivational and volitional determinants of depression: The degenerated-intention hypothesis. *J Abnorm Psychol*. 1986; 95(3): 247–51, <https://doi.org/10.1037//0021-843x.95.3.247> PMID: 3745646
99. Biebrich R, Kuhl J. [Motivation and health. Need frustration as a mediator between self-regulatory deficits and psychosomatic symptoms]. *Z Psychol*. 2002; 210(2):74–86. German, <https://doi.org/10.1026//0044-3409.210.2.74>
100. Brunstein JC. Hilflosigkeit, Depression und Handlungskontrolle [Helplessness, depression and action control]. In: Heckhausen H, editor. *Motivationsforschung*. Vol. 12. Göttingen: Hogrefe; 1990.
101. Luka-Krausgrill C, Wurmthaler C, Wiesheu M., Becker T. [Depression and chronic pain: The Role of daily demands and action control]. *Verhaltenstherapie*. 1992; 2(4): 314–20. German, <https://doi.org/10.1159/000258300>
102. Kuhl J, Weiss M. Performance deficits following uncontrollable failure: Impaired action control or global attributions and generalized expectancy deficits? In: Kuhl J, Beckmann J., editor. *Volition and personality: Action versus state orientation*. Göttingen, Germany: Hogrefe; 1994. p. 317–28.



103. Birk MV, Mandryk R. L., Baumann N. Just a click away: Action–state orientation moderates the impact of task interruptions on initiative. *J Pers.* 2019; 88(2): 373–90, <https://doi.org/10.1111/jopy.12498> PMID: 31257587
104. Huijnen IPJ, Verbunt JA, Peters ML, Smeets RJ, Kindermans HPJ, Roelofs J, et al. Differences in activity-related behaviour among patients with chronic low back pain. *Eur J Pain.* 2011; 15(7): 748–55, <https://doi.org/10.1016/j.ejpain.2010.11.015> PMID: 21195646
105. Sudhaus S, Fricke B, Schneider S, Stachon A, Klein H, von Düring M, et al. [The cortisol awakening response in patients with acute and chronic low back pain. Relations with psychological risk factors of pain chronicity]. *Schmerz.* 2007; 21(3): 202–11. German, <https://doi.org/10.1007/s00482-006-0521-4> PMID: 17265015
106. Quirin M, Bode RC, Kuhl J. Recovering from negative events by boosting implicit positive affect. *Cognit Emot.* 2011; 25(3): 559–70, <https://doi.org/10.1080/02699931.2010.536418> PMID: 21432694
107. Zautra AJ, Johnson LM, Davis MC. Positive affect as a source of resilience for women in chronic pain. *J Consult Clin Psychol.* 2005; 73(2): 212–20, <https://doi.org/10.1037/0022-006X.73.2.212> PMID: 15796628
108. Park SH, Sonty N. Positive affect mediates the relationship between pain-related coping efficacy and interference in social functioning. *J Pain.* 2010; 11(12): 1267–73, <https://doi.org/10.1016/j.jpain.2010.02.023> PMID: 20418176
109. McCracken LM. Committed action: an application of the psychological flexibility model to activity patterns in chronic pain. *J Pain.* 2013; 14(8): 828–35, <https://doi.org/10.1016/j.jpain.2013.02.009> PMID: 23651881
110. Schmitz U, Saile H, Nilges P. Coping with chronic pain: flexible goal adjustment as an interactive buffer against pain-related distress. *Pain.* 1996; 67(1): 41–51, [https://doi.org/10.1016/0304-3959\(96\)03108-9](https://doi.org/10.1016/0304-3959(96)03108-9) PMID: 8895230
111. Schrooten MG, Van Damme S, Crombez G, Peters ML, Vogt J, Vlaeyen JWS. Nonpain goal pursuit inhibits attentional bias to pain. *Pain.* 2012; 153(6): 1180–6, <https://doi.org/10.1016/j.pain.2012.01.025> PMID: 22409943
112. Kindermans HPJ, Roelofs J, Goossens MEJB, Huijnen IPJ, Verbunt JA, Vlaeyen JWS. Activity patterns in chronic pain: underlying dimensions and associations with disability and depressed mood. *J Pain.* 2011; 12(10): 1049–58, <https://doi.org/10.1016/j.jpain.2011.04.009> PMID: 21704568
113. Crombez G, Eccleston C, Van Damme S, Vlaeyen JW, Karoly P. Fear-avoidance model of chronic pain: the next generation. *Clin J Pain.* 2012; 28(6): 475–83, <https://doi.org/10.1097/AJP.0b013e3182385392> PMID: 22673479
114. Hofmann SG, Hayes SC. Functional analysis is dead: Long live functional analysis. *Clin Psychol Sci.* 2019; 7(1): 63–7, <https://doi.org/10.1177/2167702618805513> PMID: 30713812
115. Kiosses DN, Ravdin LD, Stern A, Boiler R, Kenien C, Reid MC. Problem Adaptation Therapy for Pain (PATH-Pain): A psychosocial intervention for older adults with chronic pain and negative emotions in primary care. *Geriatrics.* 2017; 2(1), <https://doi.org/10.3390/geriatrics2010005> PMID: 29034259
116. Baumann N, Quirin M. [Motivation and health. Need frustration as a mediator between self-regulatory deficits and psychosomatic symptoms]. *Z Gesundheitspsychol.* 2006; 14(2): 46–53. German, <https://doi.org/10.1026/0943-8149.14.2.46>
117. Kaschel R, Kuhl J. Motivational counseling in an extended functional context: personality systems interaction theory and assessment. In: Cox WM, Klinger E, editors. *Handbook of motivational counseling: Concepts, approaches, and assessment.* New York: John Wiley & Sons Ltd; 2004. p. 99–119. <https://doi.org/10.1002/syn.20045> PMID: 15236346
